# Supplementary material for: Anticancer Activities of the Quinone-Methide Triterpenes Maytenin and 22-β-hydroxymaytenin Obtained from Cultivated Maytenus ilicifolia Roots Associated with Down-Regulation of miRNA-27a and miR-20a/miR-17-5p
Source: MDPI journal article supplement (doi:10.3390/molecules25030760), 2020-02-10
Supplement: s1 [file s1]

## Supplementary Material Table S2

### A: Gene expression regulation of miRNAs following treatment of Oral Keratinocytes with maytenin, 22- $\beta$ -hydroxymaytenin or cisplatin.

FC: Fold-Change Treatment vs Control; K: Keratinocyte.

| systematic_<br>name | FC<br>([K 22b] vs<br>[K Control]) | Regulation<br>([K 22b] vs<br>[K Control]) | FC<br>([K Maytenin] vs<br>[K Control]) | Regulation<br>([K Maytenin] vs<br>[K Control]) | FC<br>([K Cisplatin] vs<br>[K Control]) | Regulation<br>([K Cisplatin] vs<br>[K Control]) | mirbase<br>accession |
|---------------------|-----------------------------------|-------------------------------------------|----------------------------------------|------------------------------------------------|-----------------------------------------|-------------------------------------------------|----------------------|
| hsa-let-7a-5p       | 1.3                               | up                                        | 7.6                                    | up                                             | 1.7                                     | up                                              | MIMAT0000062         |
| hsa-let-7b-5p       | 1.6                               | up                                        | 8.7                                    | up                                             | 1.9                                     | up                                              | MIMAT0000063         |
| hsa-let-7c          | 1.0                               | up                                        | 5.6                                    | up                                             | 1.5                                     | up                                              | MIMAT0000064         |
| hsa-let-7d-3p       | -1.0                              | down                                      | 28.1                                   | up                                             | 16.9                                    | up                                              | MIMAT0004484         |
| hsa-let-7d-5p       | 20.9                              | up                                        | 102.0                                  | up                                             | -1.0                                    | down                                            | MIMAT0000065         |
| hsa-let-7e-5p       | -25.4                             | down                                      | 4.8                                    | up                                             | 1.3                                     | up                                              | MIMAT0000066         |
| hsa-let-7f-5p       | 1.1                               | up                                        | 7.5                                    | up                                             | 1.5                                     | up                                              | MIMAT0000067         |
| hsa-let-7g-5p       | 1.1                               | up                                        | 5.4                                    | up                                             | 1.5                                     | up                                              | MIMAT0000414         |
| hsa-let-7i-5p       | -1.1                              | down                                      | 4.7                                    | up                                             | 1.5                                     | up                                              | MIMAT0000415         |
| hsa-miR-100-5p      | 26.8                              | up                                        | 240.0                                  | up                                             | 36.2                                    | up                                              | MIMAT0000098         |
| hsa-miR-103a-3p     | 28.5                              | up                                        | 148.6                                  | up                                             | 40.6                                    | up                                              | MIMAT0000101         |
| hsa-miR-107         | -1.0                              | down                                      | 69.8                                   | up                                             | -1.0                                    | down                                            | MIMAT0000104         |
| hsa-miR-1202        | 108.5                             | up                                        | 324.1                                  | up                                             | 82.8                                    | up                                              | MIMAT0005865         |
| hsa-miR-1207-5p     | 119.7                             | up                                        | 186.3                                  | up                                             | 62.8                                    | up                                              | MIMAT0005871         |
| hsa-miR-1225-5p     | 157.4                             | up                                        | 218.3                                  | up                                             | 74.2                                    | up                                              | MIMAT0005572         |
| hsa-miR-1229-5p     | 44.2                              | up                                        | -1.0                                   | down                                           | -1.0                                    | down                                            | MIMAT0022942         |
| hsa-miR-1234-5p     | 12.4                              | up                                        | 17.9                                   | up                                             | 7.9                                     | up                                              | MIMAT0022944         |
| hsa-miR-1246        | 35.5                              | up                                        | 112.1                                  | up                                             | -1.0                                    | down                                            | MIMAT0005898         |
| hsa-miR-125a-5p     | -1.0                              | down                                      | 84.1                                   | up                                             | -1.0                                    | down                                            | MIMAT0000443         |
| hsa-miR-125b-5p     | -2.3                              | down                                      | 3.6                                    | up                                             | 1.1                                     | up                                              | MIMAT0000423         |
| hsa-miR-1260a       | 1.4                               | up                                        | 3.7                                    | up                                             | 1.8                                     | up                                              | MIMAT0005911         |

| systematic_<br>name | FC<br>([K 22b] vs<br>[K Control]) | Regulation<br>([K 22b] vs<br>[K Control]) | FC<br>([K Maytenin] vs<br>[K Control]) | Regulation<br>([K Maytenin] vs<br>[K Control]) | FC<br>([K Cisplatin] vs<br>[K Control]) | Regulation<br>([K Cisplatin] vs<br>[K Control]) | mirbase<br>accession |
|---------------------|-----------------------------------|-------------------------------------------|----------------------------------------|------------------------------------------------|-----------------------------------------|-------------------------------------------------|----------------------|
| hsa-miR-1260b       | 1.2                               | up                                        | 5.1                                    | up                                             | 1.9                                     | up                                              | MIMAT0015041         |
| hsa-miR-1268a       | 82.9                              | up                                        | 83.6                                   | up                                             | 32.4                                    | up                                              | MIMAT0005922         |
| hsa-miR-1273g-3p    | 1.7                               | up                                        | 6.7                                    | up                                             | 1.9                                     | up                                              | MIMAT0022742         |
| hsa-miR-130a-3p     | 1.1                               | up                                        | 7.3                                    | up                                             | 1.6                                     | up                                              | MIMAT0000425         |
| hsa-miR-135a-5p     | -1.0                              | down                                      | 75.6                                   | up                                             | -1.0                                    | down                                            | MIMAT0000428         |
| hsa-miR-135b-5p     | 20.8                              | up                                        | 156.6                                  | up                                             | -1.0                                    | down                                            | MIMAT0000758         |
| hsa-miR-141-3p      | 2.7                               | up                                        | 7.3                                    | up                                             | 3.8                                     | up                                              | MIMAT0000432         |
| hsa-miR-15b-5p      | -1.0                              | down                                      | 61.2                                   | up                                             | -1.0                                    | down                                            | MIMAT0000417         |
| hsa-miR-16-5p       | 1.4                               | up                                        | 5.3                                    | up                                             | 1.7                                     | up                                              | MIMAT0000069         |
| hsa-miR-17-5p       | -1.0                              | down                                      | 55.4                                   | up                                             | -1.0                                    | down                                            | MIMAT0000070         |
| hsa-miR-188-5p      | 51.9                              | up                                        | -1.0                                   | down                                           | -1.0                                    | down                                            | MIMAT0000457         |
| hsa-miR-191-3p      | -1.1                              | down                                      | -11.4                                  | down                                           | -11.4                                   | down                                            | MIMAT0001618         |
| hsa-miR-1915-3p     | 174.1                             | up                                        | 170.6                                  | up                                             | 95.3                                    | up                                              | MIMAT0007892         |
| hsa-miR-193b-3p     | 22.4                              | up                                        | 142.2                                  | up                                             | 40.0                                    | up                                              | MIMAT0002819         |
| hsa-miR-196a-5p     | -1.0                              | down                                      | 59.2                                   | up                                             | -1.0                                    | down                                            | MIMAT0000226         |
| hsa-miR-196b-5p     | -1.0                              | down                                      | 70.9                                   | up                                             | -1.0                                    | down                                            | MIMAT0001080         |
| hsa-miR-199a-3p     | -40.1                             | down                                      | 4.3                                    | up                                             | -1.1                                    | down                                            | MIMAT0000232         |
| hsa-miR-19b-3p      | 1.4                               | up                                        | 6.1                                    | up                                             | 2.1                                     | up                                              | MIMAT0000074         |
| hsa-miR-200b-3p     | 36.3                              | up                                        | 189.3                                  | up                                             | 42.6                                    | up                                              | MIMAT0000318         |
| hsa-miR-200c-3p     | 2.1                               | up                                        | 11.7                                   | up                                             | 3.5                                     | up                                              | MIMAT0000617         |
| hsa-miR-203a        | 1.8                               | up                                        | 14.0                                   | up                                             | 2.5                                     | up                                              | MIMAT0000264         |
| hsa-miR-204-5p      | -1.0                              | down                                      | 60.0                                   | up                                             | -1.0                                    | down                                            | MIMAT0000265         |
| hsa-miR-205-5p      | 1.5                               | up                                        | 8.2                                    | up                                             | 2.4                                     | up                                              | MIMAT0000266         |
| hsa-miR-20a-5p      | 1.7                               | up                                        | 8.3                                    | up                                             | 3.4                                     | up                                              | MIMAT0000075         |
| hsa-miR-21-5p       | 1.4                               | up                                        | 5.7                                    | up                                             | 2.1                                     | up                                              | MIMAT0000076         |
| hsa-miR-210         | -1.0                              | down                                      | 59.9                                   | up                                             | -1.0                                    | down                                            | MIMAT0000267         |

| systematic_<br>name | FC<br>([K 22b] vs<br>[K Control]) | Regulation<br>([K 22b] vs<br>[K Control]) | FC<br>([K Maytenin] vs<br>[K Control]) | Regulation<br>([K Maytenin] vs<br>[K Control]) | FC<br>([K Cisplatin] vs<br>[K Control]) | Regulation<br>([K Cisplatin] vs<br>[K Control]) | mirbase<br>accession |
|---------------------|-----------------------------------|-------------------------------------------|----------------------------------------|------------------------------------------------|-----------------------------------------|-------------------------------------------------|----------------------|
| hsa-miR-211-5p      | -1.0                              | down                                      | 142.2                                  | up                                             | -1.0                                    | down                                            | MIMAT0000268         |
| hsa-miR-22-3p       | 1.3                               | up                                        | 5.9                                    | up                                             | 1.8                                     | up                                              | MIMAT0000077         |
| hsa-miR-222-3p      | -1.0                              | down                                      | 81.4                                   | up                                             | -1.0                                    | down                                            | MIMAT0000279         |
| hsa-miR-23a-3p      | 1.5                               | up                                        | 11.1                                   | up                                             | 2.1                                     | up                                              | MIMAT0000078         |
| hsa-miR-23b-3p      | -1.0                              | down                                      | 62.0                                   | up                                             | -1.0                                    | down                                            | MIMAT0000418         |
| hsa-miR-24-3p       | 1.5                               | up                                        | 7.5                                    | up                                             | 2.1                                     | up                                              | MIMAT0000080         |
| hsa-miR-26a-2-3p    | -1.0                              | down                                      | 27.1                                   | up                                             | -1.0                                    | down                                            | MIMAT0004681         |
| hsa-miR-27a-3p      | 1.9                               | up                                        | 7.9                                    | up                                             | 2.9                                     | up                                              | MIMAT0000084         |
| hsa-miR-27b-3p      | -1.0                              | down                                      | 72.4                                   | up                                             | -1.0                                    | down                                            | MIMAT0000419         |
| hsa-miR-2861        | 196.3                             | up                                        | 160.0                                  | up                                             | 62.2                                    | up                                              | MIMAT0013802         |
| hsa-miR-29a-3p      | 1.2                               | up                                        | 6.2                                    | up                                             | 1.6                                     | up                                              | MIMAT0000086         |
| hsa-miR-29a-5p      | -1.0                              | down                                      | 95.7                                   | up                                             | -1.0                                    | down                                            | MIMAT0004503         |
| hsa-miR-29b-3p      | 1.6                               | up                                        | 4.7                                    | up                                             | 2.1                                     | up                                              | MIMAT0000100         |
| hsa-miR-29c-3p      | -1.0                              | down                                      | 64.2                                   | up                                             | -1.0                                    | down                                            | MIMAT0000681         |
| hsa-miR-302a-3p     | -1.0                              | down                                      | 65.8                                   | up                                             | -1.0                                    | down                                            | MIMAT0000684         |
| hsa-miR-302b-3p     | -1.0                              | down                                      | 31.6                                   | up                                             | -1.0                                    | down                                            | MIMAT0000715         |
| hsa-miR-31-3p       | -1.0                              | down                                      | 61.3                                   | up                                             | -1.0                                    | down                                            | MIMAT0004504         |
| hsa-miR-31-5p       | -1.0                              | down                                      | 103.9                                  | up                                             | 34.4                                    | up                                              | MIMAT0000089         |
| hsa-miR-3121-5p     | -1.0                              | down                                      | 58.4                                   | up                                             | -1.0                                    | down                                            | MIMAT0019199         |
| hsa-miR-3162-5p     | 177.5                             | up                                        | 368.2                                  | up                                             | 111.0                                   | up                                              | MIMAT0015036         |
| hsa-miR-3173-5p     | -1.0                              | down                                      | 71.1                                   | up                                             | -1.0                                    | down                                            | MIMAT0019214         |
| hsa-miR-3195        | 57.4                              | up                                        | 65.7                                   | up                                             | 33.1                                    | up                                              | MIMAT0015079         |
| hsa-miR-3196        | 43.1                              | up                                        | -1.0                                   | down                                           | -1.0                                    | down                                            | MIMAT0015080         |
| hsa-miR-320b        | -1.0                              | down                                      | 57.7                                   | up                                             | -1.0                                    | down                                            | MIMAT0005792         |
| hsa-miR-328         | -1.0                              | down                                      | 130.0                                  | up                                             | 34.5                                    | up                                              | MIMAT0000752         |
| hsa-miR-335-3p      | -1.0                              | down                                      | 59.3                                   | up                                             | -1.0                                    | down                                            | MIMAT0004703         |

| <b>systematic_<br/>name</b> | <b>FC<br/>([K 22b] vs<br/>[K Control])</b> | <b>Regulation<br/>([K 22b] vs<br/>[K Control])</b> | <b>FC<br/>([K Maytenin] vs<br/>[K Control])</b> | <b>Regulation<br/>([K Maytenin] vs<br/>[K Control])</b> | <b>FC<br/>([K Cisplatin] vs<br/>[K Control])</b> | <b>Regulation<br/>([K Cisplatin] vs<br/>[K Control])</b> | <b>mirbase<br/>accession</b> |
|-----------------------------|--------------------------------------------|----------------------------------------------------|-------------------------------------------------|---------------------------------------------------------|--------------------------------------------------|----------------------------------------------------------|------------------------------|
| hsa-miR-337-3p              | -1.0                                       | down                                               | 149.5                                           | up                                                      | -1.0                                             | down                                                     | MIMAT0000754                 |
| hsa-miR-34a-5p              | 1.2                                        | up                                                 | 7.6                                             | up                                                      | 1.7                                              | up                                                       | MIMAT0000255                 |
| hsa-miR-3613-5p             | -1.0                                       | down                                               | 62.2                                            | up                                                      | -1.0                                             | down                                                     | MIMAT0017990                 |
| hsa-miR-3617-3p             | -1.0                                       | down                                               | 146.5                                           | up                                                      | -1.0                                             | down                                                     | MIMAT0022966                 |
| hsa-miR-3656                | 4.6                                        | up                                                 | 3.3                                             | up                                                      | 3.8                                              | up                                                       | MIMAT0018076                 |
| hsa-miR-3665                | 152.5                                      | up                                                 | 186.9                                           | up                                                      | 52.4                                             | up                                                       | MIMAT0018087                 |
| hsa-miR-3676-5p             | 9.4                                        | up                                                 | 18.6                                            | up                                                      | 7.9                                              | up                                                       | MIMAT0022734                 |
| hsa-miR-3679-5p             | 22.3                                       | up                                                 | -1.0                                            | down                                                    | -1.0                                             | down                                                     | MIMAT0018104                 |
| hsa-miR-376b-5p             | -1.0                                       | down                                               | 59.2                                            | up                                                      | -1.0                                             | down                                                     | MIMAT0022923                 |
| hsa-miR-376c-5p             | -1.0                                       | down                                               | 59.6                                            | up                                                      | -1.0                                             | down                                                     | MIMAT0022861                 |
| hsa-miR-3940-5p             | 33.0                                       | up                                                 | -1.0                                            | down                                                    | -1.0                                             | down                                                     | MIMAT0019229                 |
| hsa-miR-3960                | 7.3                                        | up                                                 | 9.3                                             | up                                                      | 4.3                                              | up                                                       | MIMAT0019337                 |
| hsa-miR-424-5p              | -1.0                                       | down                                               | 71.0                                            | up                                                      | -1.0                                             | down                                                     | MIMAT0001341                 |
| hsa-miR-4281                | 5.5                                        | up                                                 | 8.5                                             | up                                                      | 3.8                                              | up                                                       | MIMAT0016907                 |
| hsa-miR-4284                | 1.2                                        | up                                                 | 6.2                                             | up                                                      | 1.4                                              | up                                                       | MIMAT0016915                 |
| hsa-miR-4286                | 2.0                                        | up                                                 | 5.8                                             | up                                                      | 2.4                                              | up                                                       | MIMAT0016916                 |
| hsa-miR-4290                | -1.0                                       | down                                               | 59.3                                            | up                                                      | -1.0                                             | down                                                     | MIMAT0016921                 |
| hsa-miR-4299                | 49.2                                       | up                                                 | -1.0                                            | down                                                    | -1.0                                             | down                                                     | MIMAT0016851                 |
| hsa-miR-4307                | -1.0                                       | down                                               | 134.2                                           | up                                                      | -1.0                                             | down                                                     | MIMAT0016860                 |
| hsa-miR-4443                | 95.8                                       | up                                                 | 115.7                                           | up                                                      | 48.6                                             | up                                                       | MIMAT0018961                 |
| hsa-miR-4454                | 1.4                                        | up                                                 | 4.1                                             | up                                                      | 1.9                                              | up                                                       | MIMAT0018976                 |
| hsa-miR-4455                | -1.0                                       | down                                               | 57.9                                            | up                                                      | -1.0                                             | down                                                     | MIMAT0018977                 |
| hsa-miR-4459                | 16.6                                       | up                                                 | 31.5                                            | up                                                      | 7.0                                              | up                                                       | MIMAT0018981                 |
| hsa-miR-4466                | 122.2                                      | up                                                 | 136.4                                           | up                                                      | 83.1                                             | up                                                       | MIMAT0018993                 |
| hsa-miR-4505                | 1.2                                        | up                                                 | 2.3                                             | up                                                      | 1.2                                              | up                                                       | MIMAT0019041                 |
| hsa-miR-4516                | 13.5                                       | up                                                 | 16.4                                            | up                                                      | 3.4                                              | up                                                       | MIMAT0019053                 |

| <b>systematic_<br/>name</b> | <b>FC<br/>([K 22b] vs<br/>[K Control])</b> | <b>Regulation<br/>([K 22b] vs<br/>[K Control])</b> | <b>FC<br/>([K Maytenin] vs<br/>[K Control])</b> | <b>Regulation<br/>([K Maytenin] vs<br/>[K Control])</b> | <b>FC<br/>([K Cisplatin] vs<br/>[K Control])</b> | <b>Regulation<br/>([K Cisplatin] vs<br/>[K Control])</b> | <b>mirbase<br/>accession</b> |
|-----------------------------|--------------------------------------------|----------------------------------------------------|-------------------------------------------------|---------------------------------------------------------|--------------------------------------------------|----------------------------------------------------------|------------------------------|
| hsa-miR-4530                | 228.4                                      | up                                                 | 427.5                                           | up                                                      | 110.0                                            | up                                                       | MIMAT0019069                 |
| hsa-miR-4665-3p             | 1.6                                        | up                                                 | -47.0                                           | down                                                    | 1.3                                              | up                                                       | MIMAT0019740                 |
| hsa-miR-4668-3p             | -1.0                                       | down                                               | 65.6                                            | up                                                      | -1.0                                             | down                                                     | MIMAT0019746                 |
| hsa-miR-4687-3p             | 189.1                                      | up                                                 | 268.7                                           | up                                                      | 56.4                                             | up                                                       | MIMAT0019775                 |
| hsa-miR-4694-5p             | -1.0                                       | down                                               | 63.5                                            | up                                                      | -1.0                                             | down                                                     | MIMAT0019786                 |
| hsa-miR-4739                | 29.7                                       | up                                                 | -1.0                                            | down                                                    | -1.0                                             | down                                                     | MIMAT0019868                 |
| hsa-miR-4741                | 24.4                                       | up                                                 | -1.0                                            | down                                                    | -1.0                                             | down                                                     | MIMAT0019871                 |
| hsa-miR-4753-3p             | -1.0                                       | down                                               | 57.8                                            | up                                                      | -1.0                                             | down                                                     | MIMAT0019891                 |
| hsa-miR-4763-3p             | 53.8                                       | up                                                 | -1.0                                            | down                                                    | -1.0                                             | down                                                     | MIMAT0019913                 |
| hsa-miR-4787-5p             | 44.8                                       | up                                                 | 61.4                                            | up                                                      | -1.0                                             | down                                                     | MIMAT0019956                 |
| hsa-miR-483-3p              | -1.0                                       | down                                               | 120.2                                           | up                                                      | -1.0                                             | down                                                     | MIMAT0002173                 |
| hsa-miR-494                 | 29.6                                       | up                                                 | 97.5                                            | up                                                      | 154.2                                            | up                                                       | MIMAT0002816                 |
| hsa-miR-5001-5p             | 44.5                                       | up                                                 | -1.0                                            | down                                                    | -1.0                                             | down                                                     | MIMAT0021021                 |
| hsa-miR-5100                | 1.5                                        | up                                                 | 5.2                                             | up                                                      | 2.2                                              | up                                                       | MIMAT0022259                 |
| hsa-miR-519e-3p             | -1.0                                       | down                                               | 63.7                                            | up                                                      | -1.0                                             | down                                                     | MIMAT0002829                 |
| hsa-miR-520d-3p             | -1.0                                       | down                                               | 64.6                                            | up                                                      | -1.0                                             | down                                                     | MIMAT0002856                 |
| hsa-miR-548ag               | -1.0                                       | down                                               | 57.3                                            | up                                                      | -1.0                                             | down                                                     | MIMAT0018969                 |
| hsa-miR-548aq-5p            | -1.0                                       | down                                               | 38.8                                            | up                                                      | -1.0                                             | down                                                     | MIMAT0022263                 |
| hsa-miR-548az-5p            | -1.0                                       | down                                               | 62.5                                            | up                                                      | -1.0                                             | down                                                     | MIMAT0025456                 |
| hsa-miR-548d-5p             | -1.0                                       | down                                               | 126.9                                           | up                                                      | -1.0                                             | down                                                     | MIMAT0004812                 |
| hsa-miR-548m                | -1.0                                       | down                                               | 124.7                                           | up                                                      | -1.0                                             | down                                                     | MIMAT0005917                 |
| hsa-miR-5703                | 78.7                                       | up                                                 | 116.9                                           | up                                                      | -1.0                                             | down                                                     | MIMAT0022496                 |
| hsa-miR-572                 | 34.0                                       | up                                                 | -1.0                                            | down                                                    | -1.0                                             | down                                                     | MIMAT0003237                 |
| hsa-miR-5739                | 1.8                                        | up                                                 | 7.1                                             | up                                                      | 2.4                                              | up                                                       | MIMAT0023116                 |
| hsa-miR-574-5p              | 23.1                                       | up                                                 | 156.4                                           | up                                                      | -1.0                                             | down                                                     | MIMAT0004795                 |
| hsa-miR-576-5p              | -1.0                                       | down                                               | 60.1                                            | up                                                      | -1.0                                             | down                                                     | MIMAT0003241                 |

| <b>systematic_<br/>name</b> | <b>FC<br/>([K 22b] vs<br/>[K Control])</b> | <b>Regulation<br/>([K 22b] vs<br/>[K Control])</b> | <b>FC<br/>([K Maytenin] vs<br/>[K Control])</b> | <b>Regulation<br/>([K Maytenin] vs<br/>[K Control])</b> | <b>FC<br/>([K Cisplatin] vs<br/>[K Control])</b> | <b>Regulation<br/>([K Cisplatin] vs<br/>[K Control])</b> | <b>mirbase<br/>accession</b> |
|-----------------------------|--------------------------------------------|----------------------------------------------------|-------------------------------------------------|---------------------------------------------------------|--------------------------------------------------|----------------------------------------------------------|------------------------------|
| hsa-miR-5787                | 226.0                                      | up                                                 | 363.3                                           | up                                                      | 31.1                                             | up                                                       | MIMAT0023252                 |
| hsa-miR-6068                | 71.8                                       | up                                                 | -1.0                                            | down                                                    | -1.0                                             | down                                                     | MIMAT0023693                 |
| hsa-miR-6085                | 1.5                                        | up                                                 | 7.1                                             | up                                                      | 2.2                                              | up                                                       | MIMAT0023710                 |
| hsa-miR-6087                | 8.4                                        | up                                                 | 10.7                                            | up                                                      | 2.9                                              | up                                                       | MIMAT0023712                 |
| hsa-miR-6088                | 8.7                                        | up                                                 | 10.2                                            | up                                                      | 6.5                                              | up                                                       | MIMAT0023713                 |
| hsa-miR-6089                | 5.7                                        | up                                                 | 7.0                                             | up                                                      | 3.3                                              | up                                                       | MIMAT0023714                 |
| hsa-miR-6090                | 8.7                                        | up                                                 | 9.5                                             | up                                                      | 4.3                                              | up                                                       | MIMAT0023715                 |
| hsa-miR-6125                | 6.7                                        | up                                                 | 8.1                                             | up                                                      | 2.8                                              | up                                                       | MIMAT0024598                 |
| hsa-miR-6126                | 24.3                                       | up                                                 | -1.0                                            | down                                                    | -1.0                                             | down                                                     | MIMAT0024599                 |
| hsa-miR-613                 | -1.0                                       | down                                               | 68.3                                            | up                                                      | -1.0                                             | down                                                     | MIMAT0003281                 |
| hsa-miR-6165                | 63.8                                       | up                                                 | 260.5                                           | up                                                      | 92.0                                             | up                                                       | MIMAT0024782                 |
| hsa-miR-630                 | 106.5                                      | up                                                 | 183.8                                           | up                                                      | -1.0                                             | down                                                     | MIMAT0003299                 |
| hsa-miR-638                 | 13.8                                       | up                                                 | 15.7                                            | up                                                      | 5.4                                              | up                                                       | MIMAT0003308                 |
| hsa-miR-642a-3p             | 95.0                                       | up                                                 | 250.6                                           | up                                                      | -1.0                                             | down                                                     | MIMAT0020924                 |
| hsa-miR-642b-3p             | 41.9                                       | up                                                 | -1.0                                            | down                                                    | -1.0                                             | down                                                     | MIMAT0018444                 |
| hsa-miR-6507-3p             | -1.0                                       | down                                               | 150.9                                           | up                                                      | -1.0                                             | down                                                     | MIMAT0025471                 |
| hsa-miR-6724-5p             | 45.5                                       | up                                                 | -1.0                                            | down                                                    | -1.0                                             | down                                                     | MIMAT0025856                 |
| hsa-miR-762                 | 63.2                                       | up                                                 | 58.8                                            | up                                                      | -1.0                                             | down                                                     | MIMAT0010313                 |
| hsa-miR-940                 | 2.2                                        | up                                                 | -23.4                                           | down                                                    | 1.5                                              | up                                                       | MIMAT0004983                 |
| hsa-miR-96-5p               | -1.0                                       | down                                               | 59.2                                            | up                                                      | -1.0                                             | down                                                     | MIMAT0000095                 |

**B: Gene expression regulation of miRNAs following treatment of SCC25 cell line with maytenin, 22- $\beta$ -hydroxymaytenin or cisplatin.**

FC: Fold-Change Treatment vs Control.

| systematic_name | FC<br>([SCC25 22b]<br>vs [SCC25<br>Control]) | Regulation<br>([SCC25 22b] vs<br>[SCC25 Control]) | FC ([SCC25<br>Maytenin] vs<br>[SCC25<br>Control]) | Regulation<br>([SCC25 Maytenin]<br>vs [SCC25<br>Control]) | FC<br>([SCC25<br>Cisplatin] vs<br>[SCC25 Control]) | Regulation<br>([SCC25<br>Cisplatin] vs<br>[SCC25 Control]) | mirbase<br>accession |
|-----------------|----------------------------------------------|---------------------------------------------------|---------------------------------------------------|-----------------------------------------------------------|----------------------------------------------------|------------------------------------------------------------|----------------------|
| hsa-let-7a-5p   | -186.1                                       | down                                              | -186.1                                            | down                                                      | 1.0                                                | up                                                         | MIMAT0000062         |
| hsa-let-7b-5p   | -125.8                                       | down                                              | -125.8                                            | down                                                      | 1.1                                                | up                                                         | MIMAT0000063         |
| hsa-let-7c      | -1.0                                         | down                                              | -1.0                                              | down                                                      | 21.9                                               | up                                                         | MIMAT0000064         |
| hsa-let-7d-5p   | -46.2                                        | down                                              | -46.2                                             | down                                                      | -1.1                                               | down                                                       | MIMAT0000065         |
| hsa-let-7e-5p   | -1.0                                         | down                                              | -1.0                                              | down                                                      | 22.9                                               | up                                                         | MIMAT0000066         |
| hsa-let-7f-5p   | -84.0                                        | down                                              | -84.0                                             | down                                                      | 1.1                                                | up                                                         | MIMAT0000067         |
| hsa-let-7g-5p   | -1.0                                         | down                                              | -1.0                                              | down                                                      | 21.9                                               | up                                                         | MIMAT0000414         |
| hsa-let-7i-5p   | -62.0                                        | down                                              | -62.0                                             | down                                                      | 1.0                                                | up                                                         | MIMAT0000415         |
| hsa-miR-100-5p  | -44.0                                        | down                                              | -44.0                                             | down                                                      | -1.2                                               | down                                                       | MIMAT0000098         |
| hsa-miR-103a-3p | -40.5                                        | down                                              | -40.5                                             | down                                                      | 1.0                                                | up                                                         | MIMAT0000101         |
| hsa-miR-1234-5p | -22.5                                        | down                                              | -22.5                                             | down                                                      | 1.1                                                | up                                                         | MIMAT0022944         |
| hsa-miR-1238-3p | -1.0                                         | down                                              | -1.0                                              | down                                                      | 10.4                                               | up                                                         | MIMAT0005593         |
| hsa-miR-1246    | -29.1                                        | down                                              | -29.1                                             | down                                                      | 4.5                                                | up                                                         | MIMAT0005898         |
| hsa-miR-1260a   | -337.3                                       | down                                              | -337.3                                            | down                                                      | 1.3                                                | up                                                         | MIMAT0005911         |
| hsa-miR-1260b   | -411.2                                       | down                                              | -411.2                                            | down                                                      | 1.0                                                | up                                                         | MIMAT0015041         |

| systematic_<br>name | FC<br>([SCC25 22b]<br>vs [SCC25<br>Control]) | Regulation<br>([SCC25 22b] vs<br>[SCC25 Control]) | FC ([SCC25<br>Maytenin] vs<br>[SCC25<br>Control]) | Regulation<br>([SCC25 Maytenin]<br>vs [SCC25<br>Control]) | FC<br>([SCC25<br>Cisplatin] vs<br>[SCC25 Control]) | Regulation<br>([SCC25<br>Cisplatin] vs<br>[SCC25 Control]) | mirbase<br>accession |
|---------------------|----------------------------------------------|---------------------------------------------------|---------------------------------------------------|-----------------------------------------------------------|----------------------------------------------------|------------------------------------------------------------|----------------------|
| hsa-miR-1268a       | -1.0                                         | down                                              | -1.0                                              | down                                                      | 25.1                                               | up                                                         | MIMAT0005922         |
| hsa-miR-1273g-3p    | -671.7                                       | down                                              | -20.2                                             | down                                                      | 1.2                                                | up                                                         | MIMAT0022742         |
| hsa-miR-1290        | -1.0                                         | down                                              | -1.0                                              | down                                                      | 27.0                                               | up                                                         | MIMAT0005880         |
| hsa-miR-141-3p      | -45.0                                        | down                                              | -45.0                                             | down                                                      | -1.0                                               | down                                                       | MIMAT0000432         |
| hsa-miR-15b-5p      | -92.7                                        | down                                              | -92.7                                             | down                                                      | -1.1                                               | down                                                       | MIMAT0000417         |
| hsa-miR-16-5p       | -88.4                                        | down                                              | -88.4                                             | down                                                      | 1.3                                                | up                                                         | MIMAT0000069         |
| hsa-miR-17-5p       | -36.4                                        | down                                              | -36.4                                             | down                                                      | -1.3                                               | down                                                       | MIMAT0000070         |
| hsa-miR-191-3p      | -24.8                                        | down                                              | -24.8                                             | down                                                      | -24.8                                              | down                                                       | MIMAT0001618         |
| hsa-miR-193b-3p     | -23.4                                        | down                                              | -23.4                                             | down                                                      | -23.4                                              | down                                                       | MIMAT0002819         |
| hsa-miR-19b-3p      | -45.6                                        | down                                              | -45.6                                             | down                                                      | -1.4                                               | down                                                       | MIMAT0000074         |
| hsa-miR-200b-3p     | -28.0                                        | down                                              | -28.0                                             | down                                                      | -1.0                                               | down                                                       | MIMAT0000318         |
| hsa-miR-200c-3p     | -36.9                                        | down                                              | -36.9                                             | down                                                      | 1.1                                                | up                                                         | MIMAT0000617         |
| hsa-miR-205-5p      | -433.6                                       | down                                              | -433.6                                            | down                                                      | -1.3                                               | down                                                       | MIMAT0000266         |
| hsa-miR-20a-5p      | -88.1                                        | down                                              | -88.1                                             | down                                                      | -1.1                                               | down                                                       | MIMAT0000075         |
| hsa-miR-21-5p       | -524.3                                       | down                                              | -524.3                                            | down                                                      | 1.0                                                | up                                                         | MIMAT0000076         |
| hsa-miR-22-3p       | -23.0                                        | down                                              | -23.0                                             | down                                                      | 1.7                                                | up                                                         | MIMAT0000077         |



| systematic_<br>name | FC<br>([SCC25 22b]<br>vs [SCC25<br>Control]) | Regulation<br>([SCC25 22b] vs<br>[SCC25 Control]) | FC ([SCC25<br>Maytenin] vs<br>[SCC25<br>Control]) | Regulation<br>([SCC25 Maytenin]<br>vs [SCC25<br>Control]) | FC<br>([SCC25<br>Cisplatin] vs<br>[SCC25 Control]) | Regulation<br>([SCC25<br>Cisplatin] vs<br>[SCC25 Control]) | mirbase<br>accession |
|---------------------|----------------------------------------------|---------------------------------------------------|---------------------------------------------------|-----------------------------------------------------------|----------------------------------------------------|------------------------------------------------------------|----------------------|
| hsa-miR-<br>23a-3p  | -35.6                                        | down                                              | -35.6                                             | down                                                      | 1.4                                                | up                                                         | MIMAT0000078         |
| hsa-miR-<br>23b-3p  | -32.7                                        | down                                              | -32.7                                             | down                                                      | 1.1                                                | up                                                         | MIMAT0000418         |
| hsa-miR-24-<br>3p   | -157.2                                       | down                                              | -157.2                                            | down                                                      | -1.0                                               | down                                                       | MIMAT0000080         |
| hsa-miR-<br>27a-3p  | -62.0                                        | down                                              | -62.0                                             | down                                                      | -1.2                                               | down                                                       | MIMAT0000084         |
| hsa-miR-<br>27b-3p  | -36.6                                        | down                                              | -36.6                                             | down                                                      | -1.1                                               | down                                                       | MIMAT0000419         |
| hsa-miR-<br>2861    | -37.3                                        | down                                              | -37.3                                             | down                                                      | -1.1                                               | down                                                       | MIMAT0013802         |
| hsa-miR-<br>29a-3p  | -64.3                                        | down                                              | -64.3                                             | down                                                      | -1.0                                               | down                                                       | MIMAT0000086         |
| hsa-miR-<br>29b-3p  | -27.3                                        | down                                              | -27.3                                             | down                                                      | -1.3                                               | down                                                       | MIMAT0000100         |
| hsa-miR-<br>3162-5p | -50.9                                        | down                                              | -50.9                                             | down                                                      | -50.9                                              | down                                                       | MIMAT0015036         |
| hsa-miR-<br>3651    | -28.8                                        | down                                              | -28.8                                             | down                                                      | -1.3                                               | down                                                       | MIMAT0018071         |
| hsa-miR-<br>3656    | -30.1                                        | down                                              | -30.1                                             | down                                                      | -1.4                                               | down                                                       | MIMAT0018076         |
| hsa-miR-<br>3665    | -1.0                                         | down                                              | -1.0                                              | down                                                      | 21.7                                               | up                                                         | MIMAT0018087         |
| hsa-miR-<br>3676-5p | -1.0                                         | down                                              | -1.0                                              | down                                                      | 33.6                                               | up                                                         | MIMAT0022734         |
| hsa-miR-<br>3960    | -57.2                                        | down                                              | -57.2                                             | down                                                      | 1.5                                                | up                                                         | MIMAT0019337         |
| hsa-miR-<br>4281    | -32.5                                        | down                                              | -32.5                                             | down                                                      | 1.3                                                | up                                                         | MIMAT0016907         |
| hsa-miR-<br>4284    | -58.9                                        | down                                              | -58.9                                             | down                                                      | -1.2                                               | down                                                       | MIMAT0016915         |

| <b>systematic_<br/>name</b> | <b>FC<br/>([SCC25 22b]<br/>vs [SCC25<br/>Control])</b> | <b>Regulation<br/>([SCC25 22b] vs<br/>[SCC25 Control])</b> | <b>FC ([SCC25<br/>Maytenin] vs<br/>[SCC25<br/>Control])</b> | <b>Regulation<br/>([SCC25 Maytenin]<br/>vs [SCC25<br/>Control])</b> | <b>FC<br/>([SCC25<br/>Cisplatin] vs<br/>[SCC25 Control])</b> | <b>Regulation<br/>([SCC25<br/>Cisplatin] vs<br/>[SCC25 Control])</b> | <b>mirbase<br/>accession</b> |
|-----------------------------|--------------------------------------------------------|------------------------------------------------------------|-------------------------------------------------------------|---------------------------------------------------------------------|--------------------------------------------------------------|----------------------------------------------------------------------|------------------------------|
| hsa-miR-4286                | -181.4                                                 | down                                                       | -181.4                                                      | down                                                                | 1.0                                                          | up                                                                   | MIMAT0016916                 |
| hsa-miR-4433-5p             | -1.0                                                   | down                                                       | 23.0                                                        | up                                                                  | 19.8                                                         | up                                                                   | MIMAT0020956                 |
| hsa-miR-4454                | -218.1                                                 | down                                                       | -20.4                                                       | down                                                                | -1.1                                                         | down                                                                 | MIMAT0018976                 |
| hsa-miR-4459                | -155.2                                                 | down                                                       | -155.2                                                      | down                                                                | 1.8                                                          | up                                                                   | MIMAT0018981                 |
| hsa-miR-4505                | -86.1                                                  | down                                                       | -86.1                                                       | down                                                                | -2.2                                                         | down                                                                 | MIMAT0019041                 |
| hsa-miR-4507                | -49.9                                                  | down                                                       | -49.9                                                       | down                                                                | -49.9                                                        | down                                                                 | MIMAT0019044                 |
| hsa-miR-4516                | -100.7                                                 | down                                                       | -100.7                                                      | down                                                                | 1.4                                                          | up                                                                   | MIMAT0019053                 |
| hsa-miR-4787-5p             | -24.5                                                  | down                                                       | -24.5                                                       | down                                                                | -1.2                                                         | down                                                                 | MIMAT0019956                 |
| hsa-miR-494                 | -36.7                                                  | down                                                       | -36.7                                                       | down                                                                | -36.7                                                        | down                                                                 | MIMAT0002816                 |
| hsa-miR-5100                | -657.4                                                 | down                                                       | -21.4                                                       | down                                                                | 1.1                                                          | up                                                                   | MIMAT0022259                 |
| hsa-miR-548b-5p             | -1.0                                                   | down                                                       | -1.0                                                        | down                                                                | 10.0                                                         | up                                                                   | MIMAT0004798                 |
| hsa-miR-5739                | -70.5                                                  | down                                                       | -70.5                                                       | down                                                                | -1.2                                                         | down                                                                 | MIMAT0023116                 |
| hsa-miR-6069                | -23.7                                                  | down                                                       | -23.7                                                       | down                                                                | -23.7                                                        | down                                                                 | MIMAT0023694                 |
| hsa-miR-6085                | -58.0                                                  | down                                                       | -58.0                                                       | down                                                                | -2.9                                                         | down                                                                 | MIMAT0023710                 |
| hsa-miR-6087                | -194.0                                                 | down                                                       | -194.0                                                      | down                                                                | -1.3                                                         | down                                                                 | MIMAT0023712                 |
| hsa-miR-6088                | -25.9                                                  | down                                                       | -25.9                                                       | down                                                                | -25.9                                                        | down                                                                 | MIMAT0023713                 |

| <b>systematic_<br/>name</b> | <b>FC<br/>([SCC25 22b]<br/>vs [SCC25<br/>Control])</b> | <b>Regulation<br/>([SCC25 22b] vs<br/>[SCC25 Control])</b> | <b>FC ([SCC25<br/>Maytenin] vs<br/>[SCC25<br/>Control])</b> | <b>Regulation<br/>([SCC25 Maytenin]<br/>vs [SCC25<br/>Control])</b> | <b>FC<br/>([SCC25<br/>Cisplatin] vs<br/>[SCC25 Control])</b> | <b>Regulation<br/>([SCC25<br/>Cisplatin] vs<br/>[SCC25 Control])</b> | <b>mirbase<br/>accession</b> |
|-----------------------------|--------------------------------------------------------|------------------------------------------------------------|-------------------------------------------------------------|---------------------------------------------------------------------|--------------------------------------------------------------|----------------------------------------------------------------------|------------------------------|
| hsa-miR-6089                | -480.1                                                 | down                                                       | -6.7                                                        | down                                                                | 1.1                                                          | up                                                                   | MIMAT0023714                 |
| hsa-miR-6090                | -27.0                                                  | down                                                       | -27.0                                                       | down                                                                | 4.1                                                          | up                                                                   | MIMAT0023715                 |
| hsa-miR-6125                | -108.5                                                 | down                                                       | -108.5                                                      | down                                                                | -1.2                                                         | down                                                                 | MIMAT0024598                 |
| hsa-miR-638                 | -43.6                                                  | down                                                       | -43.6                                                       | down                                                                | 1.0                                                          | up                                                                   | MIMAT0003308                 |
| hsa-miR-6508-5p             | -1.0                                                   | down                                                       | 21.7                                                        | up                                                                  | -1.0                                                         | down                                                                 | MIMAT0025472                 |
| hsa-miR-940                 | -24.0                                                  | down                                                       | -1.1                                                        | down                                                                | -1.0                                                         | down                                                                 | MIMAT0004983                 |
