# Supplementary material for: Anticancer Activities of the Quinone-Methide Triterpenes Maytenin and 22-β-hydroxymaytenin Obtained from Cultivated Maytenus ilicifolia Roots Associated with Down-Regulation of miRNA-27a and miR-20a/miR-17-5p
Source: MDPI journal article supplement (doi:10.3390/molecules25030760), 2020-02-10
Supplement: s1 [file s1]

## A: Maytenin

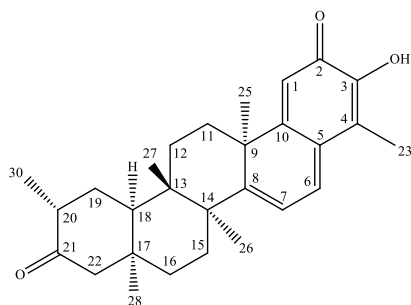

**Maytenin**

The  $^1\text{H}$  NMR spectrum of **1** (Figure S1) revealed signals at  $\delta$  2.20 (3H); 1.50 (3H); 1.35 (3H); 1.05 (3H); 0.98 (3H) and 0.85 (3H) attributed to 6 methyl groups; a doublet at  $\delta$  2.92 associated to H-22; a multiplet at  $\delta$  2.50 associated to hydrogen linked to C20; and three signals at  $\delta$  7.04 (*d*; 6.7Hz),  $\delta$  6.54 (*s*) and  $\delta$  6.38 (*d*; 6.7Hz), characteristic of a quinone methide triterpene. The  $^{13}\text{C}$ MR spectrum (Figure S2) disclosed signals at  $\delta$  41.90,  $\delta$  53.53  $\delta$  213.76 assigned to C20, C-22 and C-21, respectively. Comparison of the observed NMR spectra data (Table 1) with values reported in the literature [Rodrigues et al., 2012], together with HSQC and HMBC contour map correlations (Figures S3 and S4) of compound **1** allowed the identification of maytenin (tingenone).

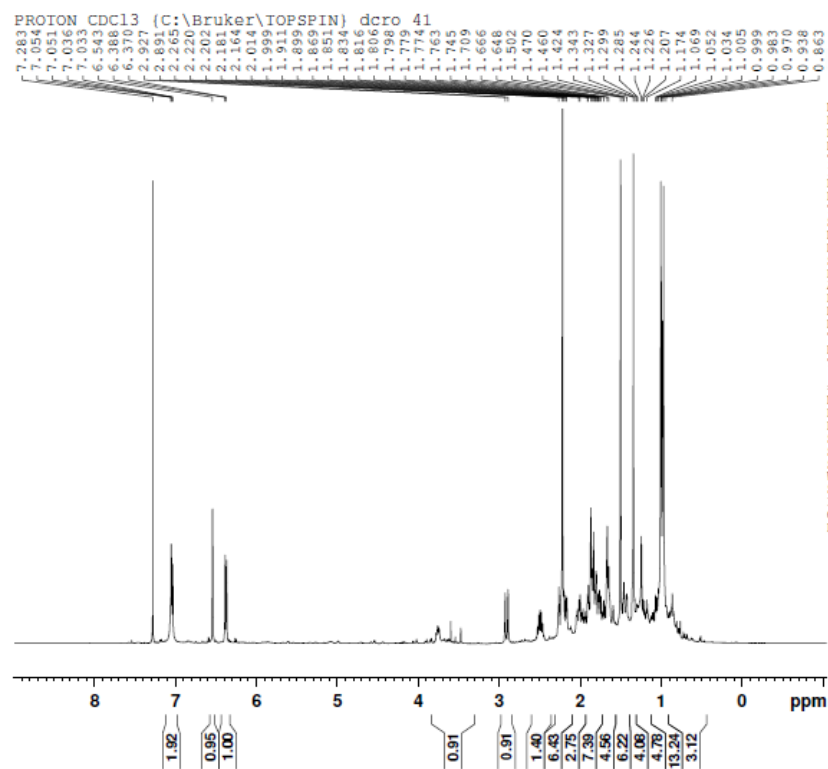

Figure S1: <sup>1</sup>H NMR spectrum of maytenin.

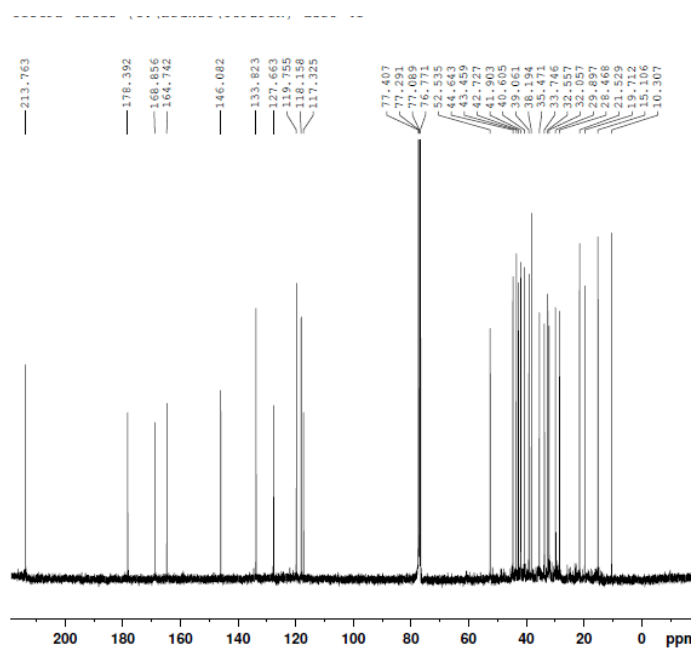

Figure S2: <sup>13</sup>C NMR spectrum of maytenin.

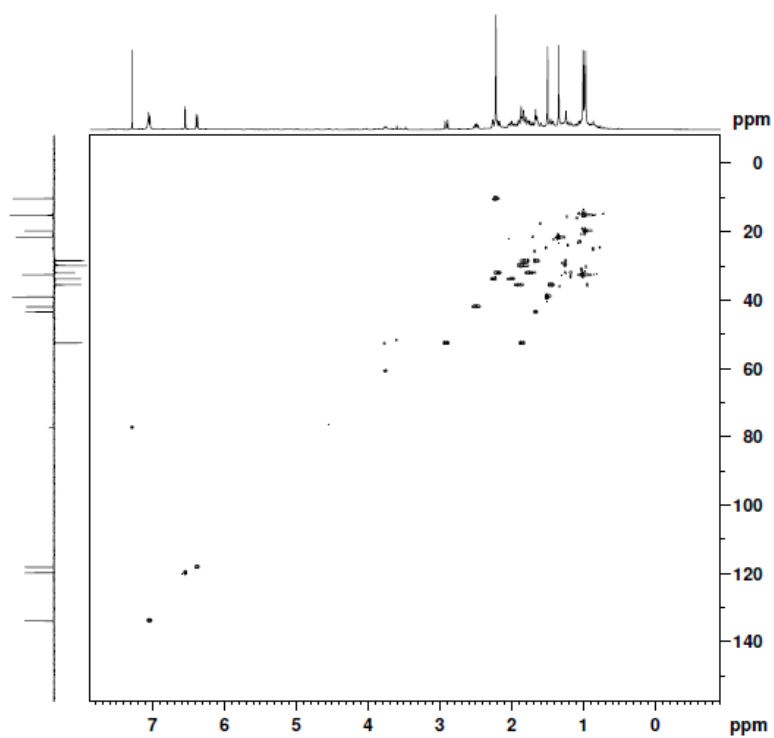

Figure S3: HSQC contour map of maytenin.

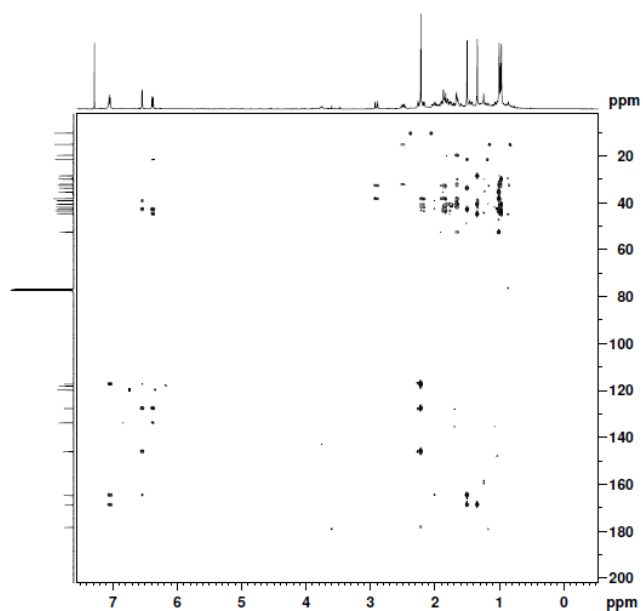

Figure S4: HMBC contour map of maytenin.

Table 1:  $^1\text{H}$  and  $^{13}\text{C}$  NMR data of maitenin in  $\text{CDCl}_3$ .

| <b>C/H</b>                | <b><math>^{13}\text{C}</math> (<math>\delta</math> in ppm)<sup>a</sup></b> | <b><math>^1\text{H}</math> (<math>\delta</math> in ppm, <math>J</math> in Hz)<sup>b</sup></b> |
|---------------------------|----------------------------------------------------------------------------|-----------------------------------------------------------------------------------------------|
| <b>CH</b>                 |                                                                            |                                                                                               |
| 1                         | 119.75                                                                     | 6.54 (s)                                                                                      |
| 6                         | 133.82                                                                     | 7.04 (d; 6.7)                                                                                 |
| 7                         | 118.15                                                                     | 6.38 (d; 6.7)                                                                                 |
| 18                        | 43.45                                                                      | 1.59-1.79 (m)                                                                                 |
| 20                        | 41.90                                                                      | 2.50 (m)                                                                                      |
| <b>CH<sub>2</sub></b>     |                                                                            |                                                                                               |
| 11                        | 33.75                                                                      | 2.00 (m)<br>2.23 (m)                                                                          |
| 12                        | 29.90                                                                      | 1.85 (m)<br>1.83 (m)                                                                          |
| 15                        | 28.47                                                                      | 1.86 (m)<br>1.65 (m)                                                                          |
| 16                        | 35.47                                                                      | 1.61 (m)<br>2.23 (m)                                                                          |
| 19                        | 32.06                                                                      | 2.20 (m)                                                                                      |
| 22                        | 53.53                                                                      | 2.92 (d; 14.4)                                                                                |
| <b>C</b>                  |                                                                            |                                                                                               |
| 2                         | 178.39                                                                     | -                                                                                             |
| 3                         | 146.08                                                                     | -                                                                                             |
| 4                         | 117.32                                                                     | -                                                                                             |
| 5                         | 127.66                                                                     | -                                                                                             |
| 8                         | 168.86                                                                     | -                                                                                             |
| 9                         | 42.73                                                                      | -                                                                                             |
| 10                        | 164.74                                                                     | -                                                                                             |
| 13                        | 40.60                                                                      | -                                                                                             |
| 14                        | 44.64                                                                      | -                                                                                             |
| 17                        | 38.19                                                                      | -                                                                                             |
| 21                        | 213.76                                                                     | -                                                                                             |
| <b>OCH<sub>3</sub>-23</b> | 10.31                                                                      | 2.20 (s)                                                                                      |
| <b>OCH<sub>3</sub>-25</b> | 39.06                                                                      | 1.50 (s)                                                                                      |
| <b>OCH<sub>3</sub>-26</b> | 21.53                                                                      | 1.35 (s)                                                                                      |
| <b>OCH<sub>3</sub>-27</b> | 19.71                                                                      | 0.98 (s)                                                                                      |
| <b>OCH<sub>3</sub>-28</b> | 32.56                                                                      | 0.85 (s)                                                                                      |
| <b>OCH<sub>3</sub>-30</b> | 15.11                                                                      | 1.05 (d; 6.3)                                                                                 |

<sup>a</sup>125 MHz. <sup>b</sup>500 MHz. Abbreviations: **d**, doublet; **s**, singlet; **m**, multiplet.

**B: 22 $\beta$ - hydroxymaitenin**

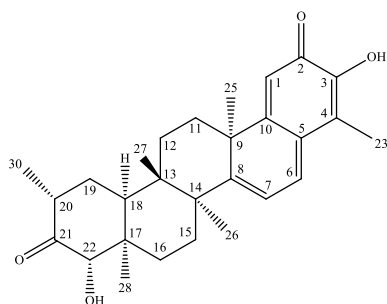

### 22 $\beta$ - hydroxymaytenin

The  $^1\text{H}$  NMR spectrum of **2** (Figure S5) revealed three olefinic signals corresponding to H-1, H-6 and H-7, besides methylene hydrogen signals in the region from  $\delta$  1.61 to 2.23ppm. It also observed signals at  $\delta$  2.21 (3H); 1.50 (3H); 1.35 (3H); 1.05 (3H); 0.96 (3H) and 0.85 (3H) attributed to 6 methyl groups H-23, H-25, H-26, H-30, H-27 e H-28, respectively; the multiplet at  $\delta$  2.65 associated to hydrogen linked to C-20, and the singlet at  $\delta$  4.53 attributed to H-22. The  $^{13}\text{C}$ MR spectrum (Figure S6) disclosed 28 carbon signals, among these, the signals at  $\delta$  213.64;  $\delta$  76.44 and  $\delta$  40.87 assigned to C-21, C-22 and C-20, respectively. From the HSQC and HMBC contour map correlations (Figures S7 and S8) of compound **2** it was possible to assign the signals from the  $^1\text{H}$ -NMR and  $^{13}\text{C}$ -NMR spectra (Table 2). The presence of NOESY correlation between H-22 ( $\delta$  4.53) and H-27 ( $\delta$  0.96) (Figure S9), and the comparison of the obtained spectral data with results reported in the literature [Likhitwitayawuid et al., 1993] confirmed the structure of 22 $\beta$ -hydroxymaytenin (22 $\beta$ -hydroxytingenone).

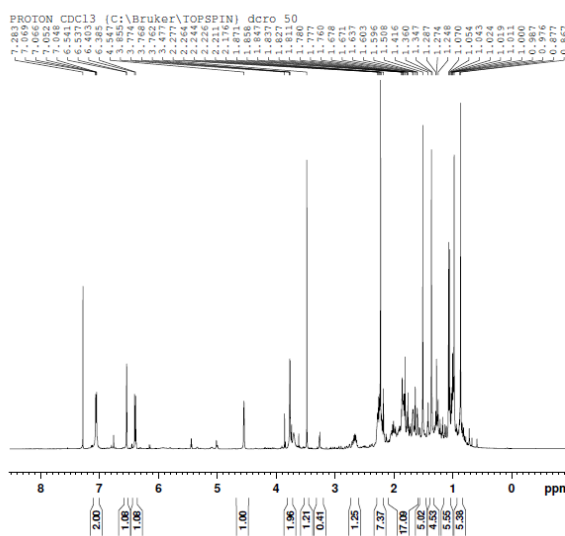

Figure S5:  $^1\text{H}$  NMR spectrum of 22 $\beta$ -hydroxymaytenin

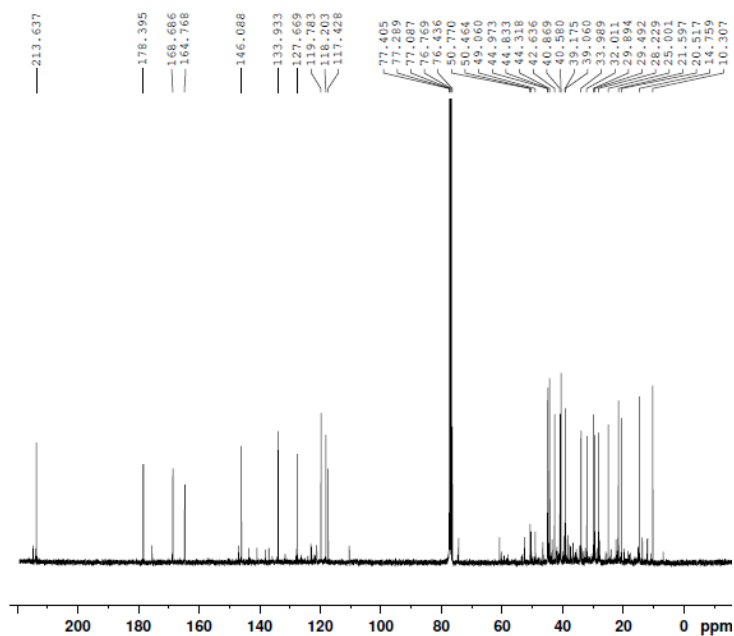

Figure S6:  $^{13}\text{C}$  NMR spectrum of 22 $\beta$ -hydroxymaytenin

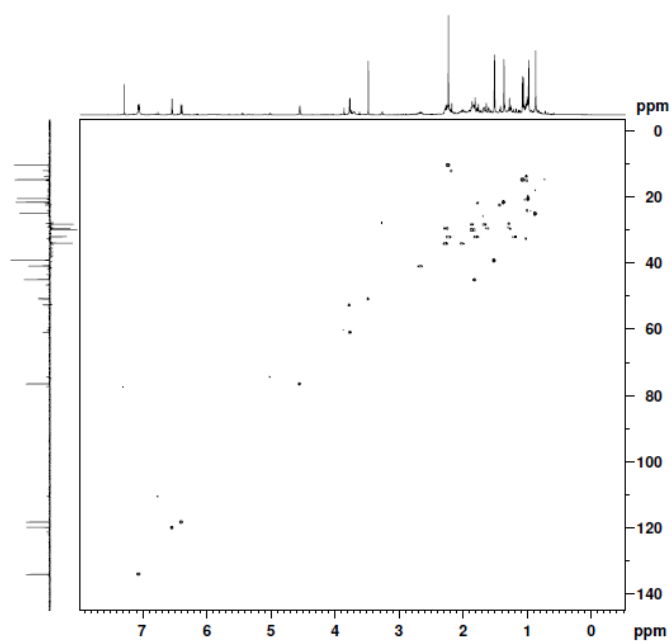

Figure S7: HSQC contour map of 22 $\beta$ -hydroxymaytenin.

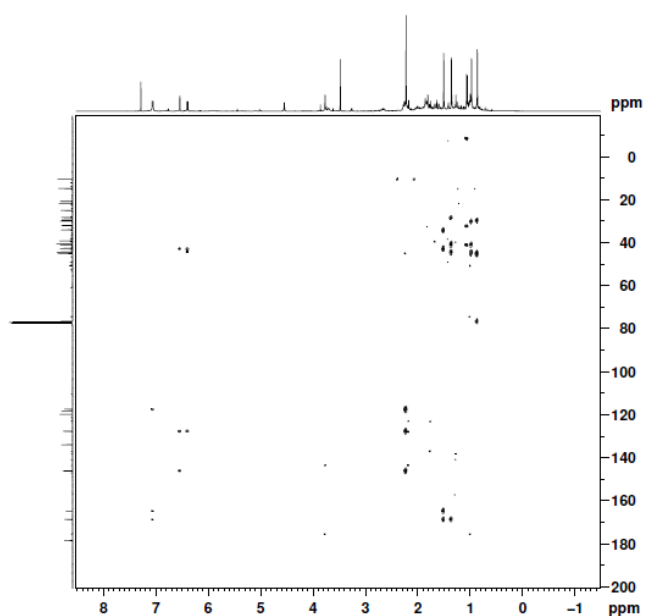

Figure S8: HMQC contour map of 22 $\beta$ -hydroxymaytenin.

Table 1:  $^1\text{H}$  and  $^{13}\text{C}$  NMR data of 22 $\beta$ -hydroxymaytenin in  $\text{CDCl}_3$ .

| C/H                   | $^{13}\text{C}$ ( $\delta$ in ppm) <sup>a</sup> | $^1\text{H}$ ( $\delta$ in ppm, $J$ in Hz) <sup>b</sup> |
|-----------------------|-------------------------------------------------|---------------------------------------------------------|
| <b>CH</b>             |                                                 |                                                         |
| 1                     | 119.78                                          | 6.54 (s)                                                |
| 6                     | 133.93                                          | 7.03 (d, 6.7Hz)                                         |
| 7                     | 118.20                                          | 6.40 (d, 6.7Hz)                                         |
| 18                    | 44.97                                           | 1.80 (m)                                                |
| 20                    | 40.87                                           | 2.65 (m)                                                |
| 22                    | 76.44                                           | 4.53 (s)                                                |
| <b>CH<sub>2</sub></b> |                                                 |                                                         |
| 11                    | 33.99                                           | 2.00 (m)<br>2.23 (m)                                    |
| 12                    | 29.89                                           | 1.85 (m)<br>1.83 (m)                                    |
| 15                    | 28.23                                           | 1.86 (m)<br>1.65 (m)                                    |
| 16                    | 29.49                                           | 1.61 (m)<br>2.23 (m)                                    |
| 19                    | 32.01                                           | 2.20 (m)                                                |
| <b>C</b>              |                                                 |                                                         |
| 2                     | 178.89                                          | -                                                       |

|                           |        |                     |
|---------------------------|--------|---------------------|
| 3                         | 146.09 | -                   |
| 4                         | 117.43 | -                   |
| 5                         | 127.67 | -                   |
| 8                         | 168.69 | -                   |
| 9                         | 42.63  | -                   |
| 10                        | 164.77 | -                   |
| 13                        | 40.58  | -                   |
| 14                        | 44.32  | -                   |
| 17                        | 44.97  | -                   |
| 21                        | 213.64 | -                   |
| <b>OCH<sub>3</sub>-23</b> | 10.31  | 2.21 (3H, s)        |
| <b>OCH<sub>3</sub>-25</b> | 39.17  | 1.50 (3H, s)        |
| <b>OCH<sub>3</sub>-26</b> | 21.59  | 1.35 (3H, s)        |
| <b>OCH<sub>3</sub>-27</b> | 20.52  | 0.96 (3H, s)        |
| <b>OCH<sub>3</sub>-28</b> | 25.00  | 0.85 (3H, s)        |
| <b>OCH<sub>3</sub>-30</b> | 14.76  | 1.05 (3H, d, 6.3Hz) |

<sup>a</sup>125 MHz. <sup>b</sup>500 MHz. Abbreviations: **d**, doublet; **s**, singlet; **m**, multiplet.



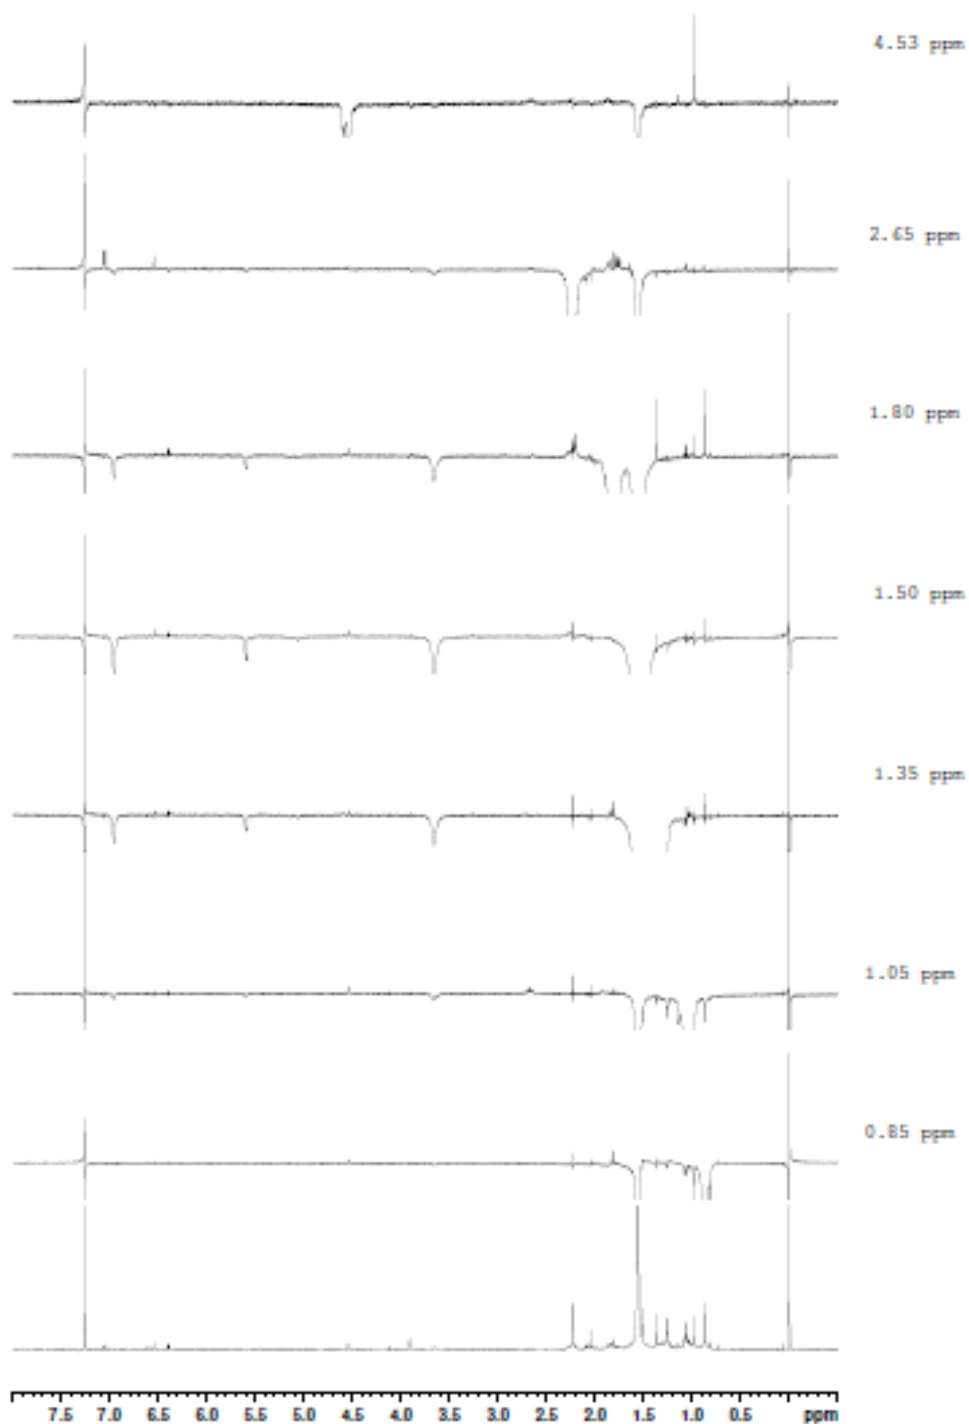

Figure S9: Spectrum for NOESY for 22 $\beta$ -hydroxymaytenin.

#### References:

Likhitwitayawuid et al., *Phytochemistry*, Vol. 34, No. 3, pp. 159-763, 1993.

Rodrigues et al., *Quim. Nova*, Vol. 35, No. 7, 1375-1380, 2012.
