# Supplementary material for: Anticancer Activities of the Quinone-Methide Triterpenes Maytenin and 22-β-hydroxymaytenin Obtained from Cultivated Maytenus ilicifolia Roots Associated with Down-Regulation of miRNA-27a and miR-20a/miR-17-5p
Source: MDPI journal article supplement (doi:10.3390/molecules25030760), 2020-02-10
Supplement: s1 [file s1]

**Supplementary Table S1:**

Genomic mutations in the cell lines used in this work, according to the Sanger COSMIC database.

| ATCC catalog | Name        | Tissue      | Histology | Tumor source | Mutant Gene                     | Mutation                                                |
|--------------|-------------|-------------|-----------|--------------|---------------------------------|---------------------------------------------------------|
| CRL-1628     | SCC25       | tongue      | carcinoma | primary      | CDKN2A<br>TP53                  | c.1_471del471<br>c.625_626delAG                         |
| CRL-1629     | SCC9        | tongue      | carcinoma | primary      | CDKN2A<br>TP53                  | c.1_150del150<br>c.822_853del32                         |
| HTB-43       | FaDu        | hypopharynx | carcinoma | primary      | CDKN2A<br>SMAD4<br>TP53<br>TP53 | c.151-1G>T<br>c.1_1659del1659<br>c.376-1G>A<br>c.743G>T |
| CCL-138      | Detroit 562 | pharynx     | carcinoma | metastasis   | CDKN2A<br>PIK3CA<br>TP53        | c.1_457del457<br>c.3140A>G<br>c.524G>A                  |

Source: HEAD AND NECK CANCER PANEL, ATCC

(<https://www.atcc.org/~media/5A82DE2BD22A41B2B1D907CBC84A0C3A.ashx>)
