# Supplementary material for: Anticancer Activities of the Quinone-Methide Triterpenes Maytenin and 22-β-hydroxymaytenin Obtained from Cultivated Maytenus ilicifolia Roots Associated with Down-Regulation of miRNA-27a and miR-20a/miR-17-5p
Source: Molecules. 2020 Feb 10;25(3):760. doi: 10.3390/molecules25030760 (PMC7038027; doi:10.3390/molecules25030760)
Supplement: Supplementary file 1 [file molecules-25-00760-s001.zip]

Archive with 4 entries (4 files):
- Supplementary Figure 1.pdf
- Supplementary File F1 Molecules.pdf
- Supplementary Table S1 Molecules.pdf
- Supplementary Table S2 Molecules.pdf
